# Supplementary material for: Preparation and formation mechanism of phase-controlled titanium dioxide microspheres by selective laser heating in liquid medium
Source: Royal Society of Chemistry journal article supplement (doi:10.1039/c6ra23481j), 2016-01-01
Supplement: c6ra23481j1.pdf [file c6ra23481j1.pdf]

### Supporting materials

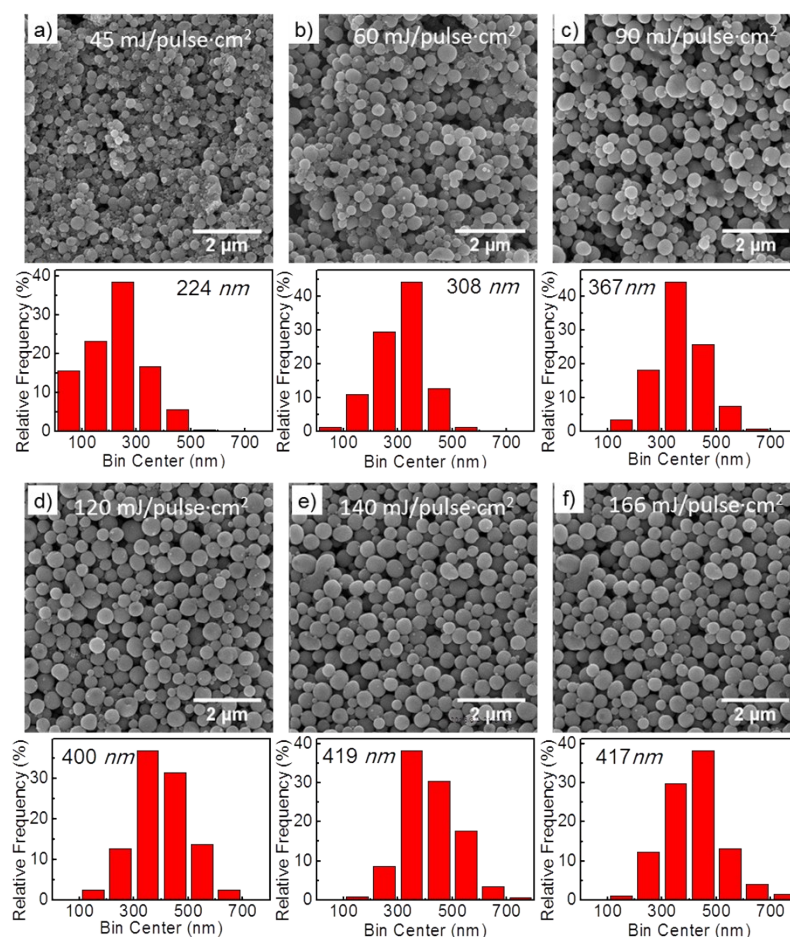

Fig. S1 The morphologies and the size distribution histogram of the spheres  
prepared by 355 nm laser irradiating

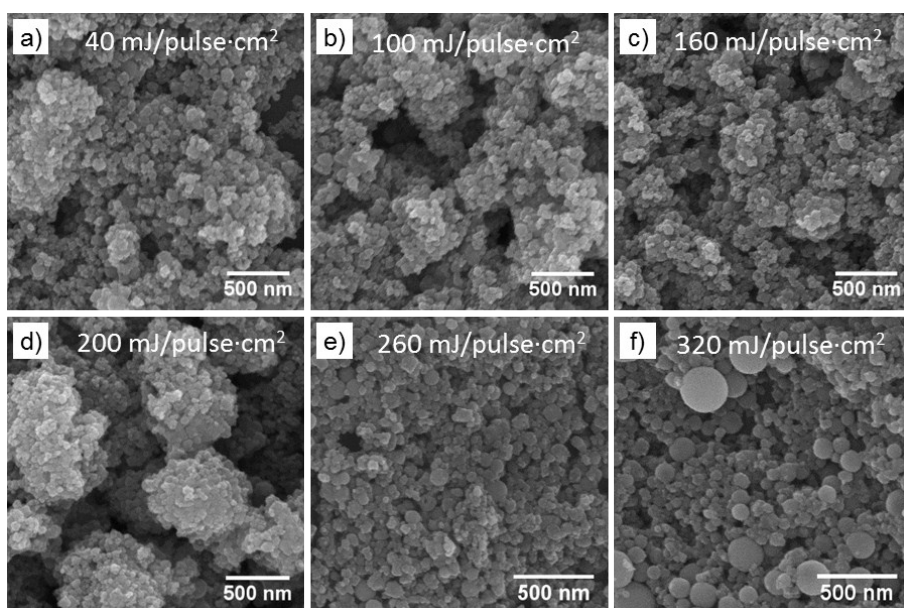

Fig. S2 The morphologies of the products prepared by 532 nm laser irradiating

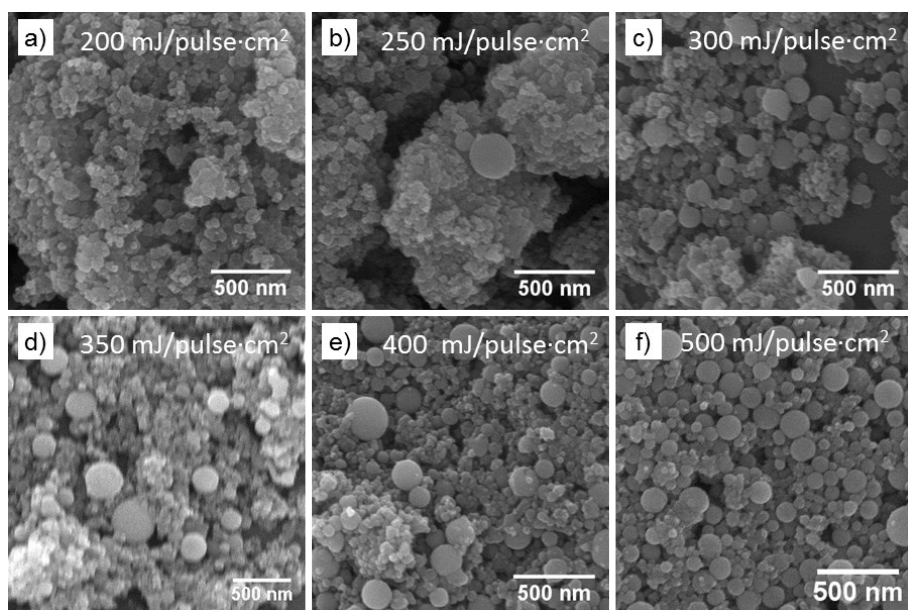

Fig. S3 The morphologies of the products prepared by 1064 nm laser irradiating

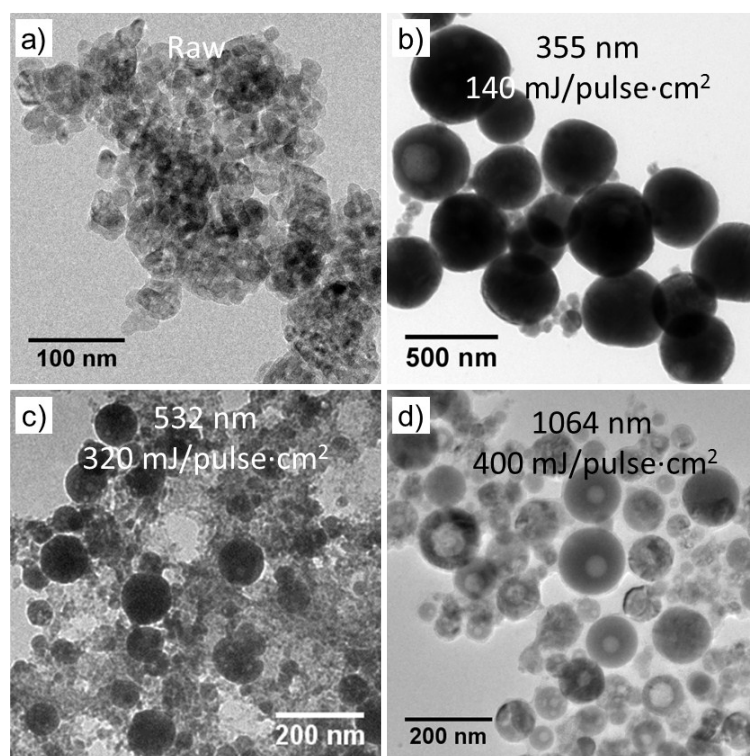

Fig. S4 TEM images of raw anatase TiO<sub>2</sub> (a), and spheres prepared by 355 nm (b), 532 nm (c), and 1064 nm (d) laser, respectively.
